# Supplementary material for: Ceramide increases free volume voids in DPPC membranes
Source: Royal Society of Chemistry journal article supplement (doi:10.1039/c5ra05142h), 2015-01-01
Supplement: c5ra05142h1.pdf [file c5ra05142h1.pdf]

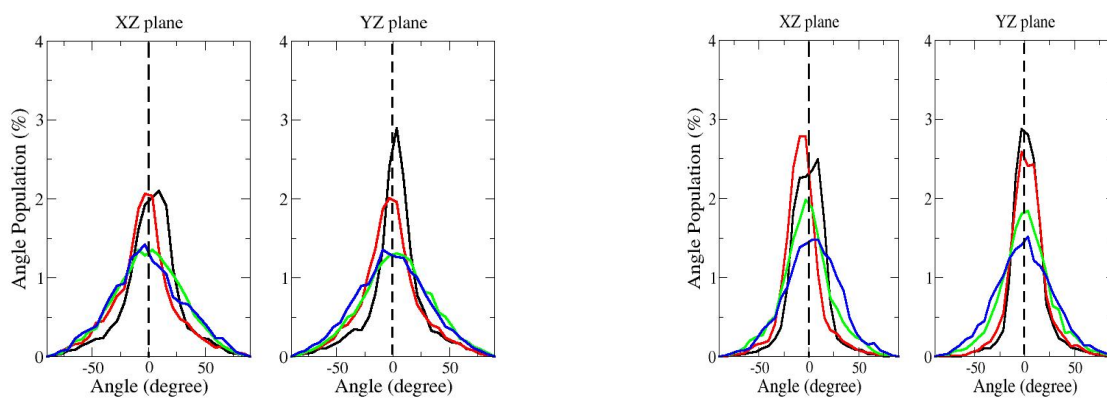

**Fig. S1** Normalized angle distributions computed for the DPPC acyl chain C atoms during the atomistic MD simulations carried out for DPPC (left) and DPPC + Cer (right) systems at four temperatures: 20 °C (in black), 30 °C (in red), 37 °C (in green) and 52 °C (in blue). The XZ and YZ angles were measured with respect to the perpendicular of the node plane (see Figure 3). Ten snapshots extracted from each simulation (see Computational Details) were considered.

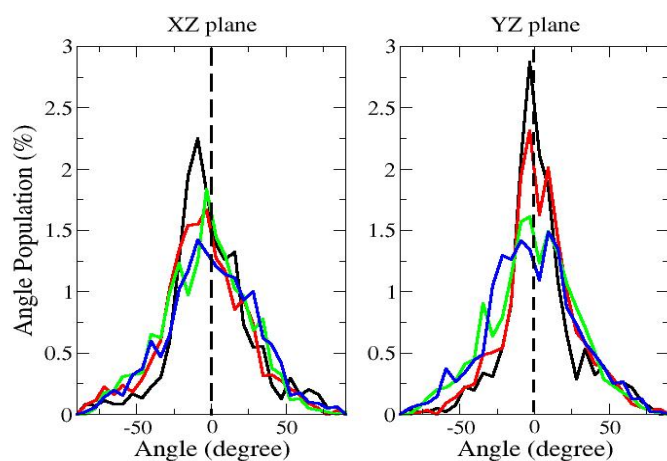

**Fig. S2** Normalized angle distributions for the Cer acyl chain C atoms during atomistic MD simulations carried out for DPPC + Cer system at four temperatures: 20°C (in black), 30°C (in red), 37°C (in green) and 52°C (in blue). The XZ and YZ angles were measured with respect to the perpendicular of the node plane (see Figure 3). Ten snapshots extracted from each simulation (see Computational Details) were considered.

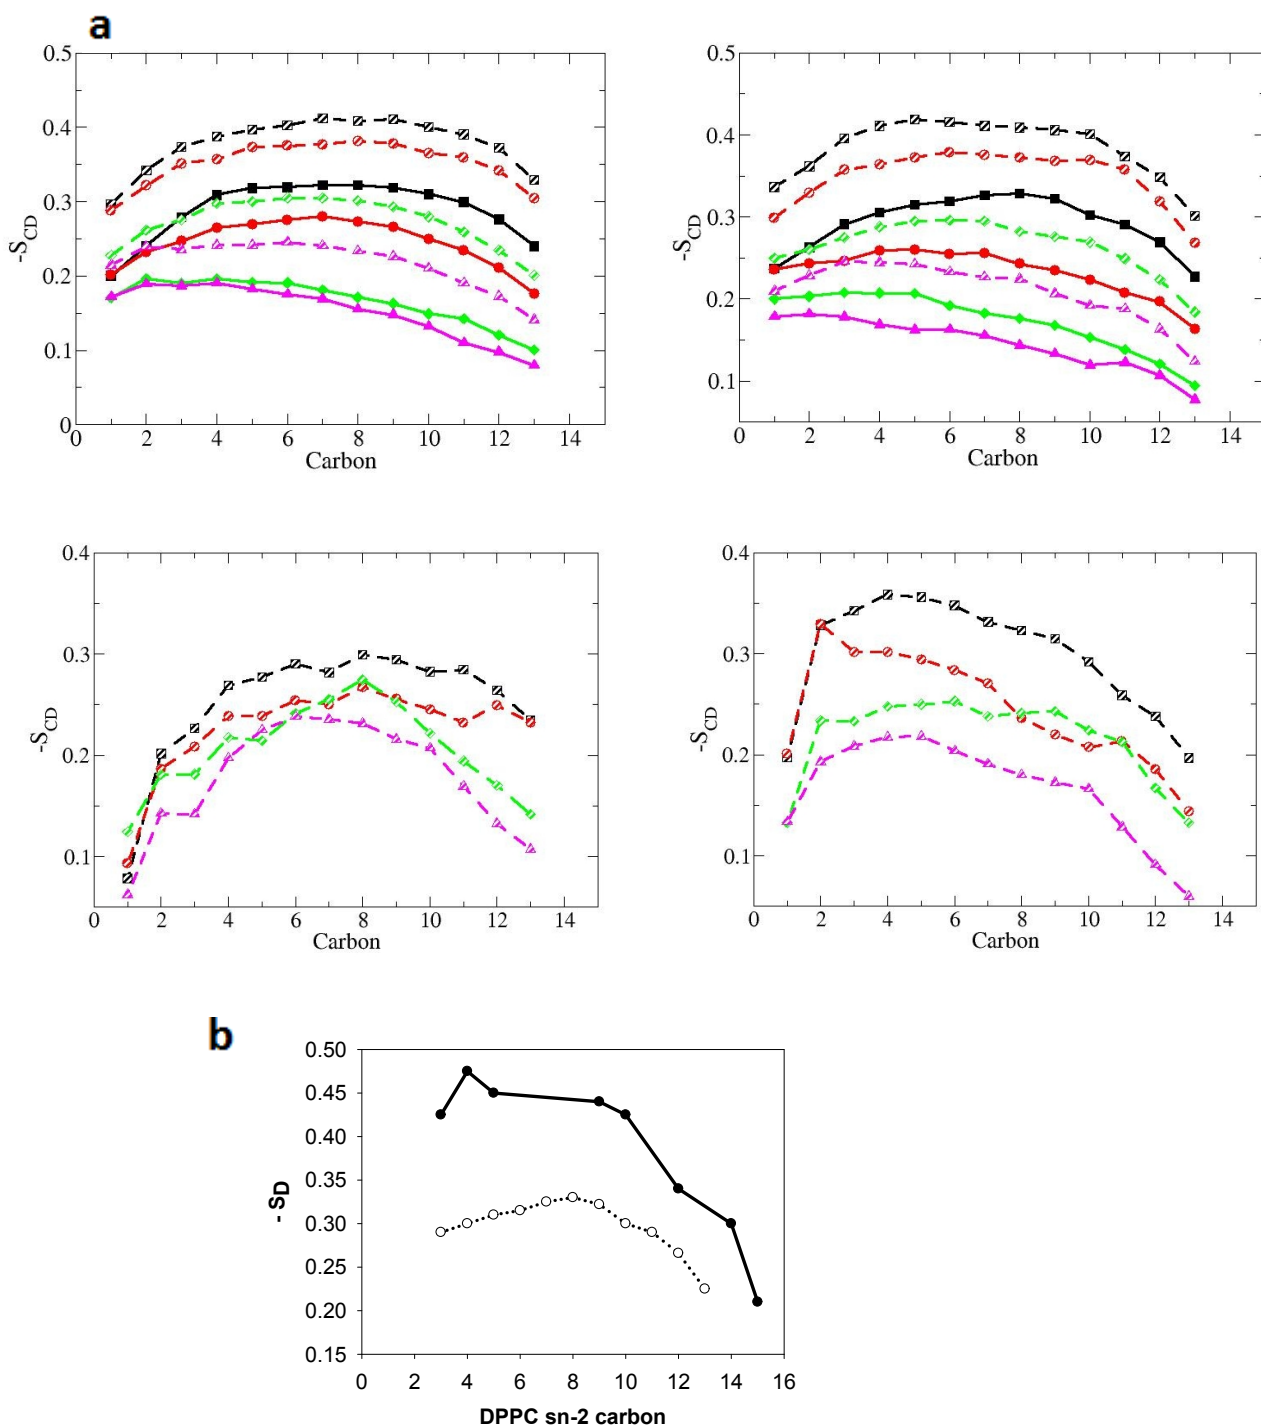

**Fig. S3** a)  $S_{CD}$  order parameter profiles for sn-1 (left) and sn-2 (right) acyl chain C atoms (see definitions in Figure 3) of DPPC (above) and Cer (below, left: sphingoid chain, right: N-acyl chain) determined from the atomistic molecular dynamics carried out at four temperatures: 20 °C (squares in black), 30 °C (circles in red), 37 °C (diamonds in green) and 52 °C (triangles in magenta). Data shown in solid lines refer to DPPC, while data in dash lines refer to DPPC + Cer. The values were determined by calculating the average value over the 10 structures extracted from each simulation. b) Comparison between chain order parameters measured for sn-2 acyl chains of pure DPPC experimentally by  $^2\text{H-NMR}$  (redrawn from Seelig and Seelig<sup>52</sup>, solid black line) and our MD profile at 20 °C (white circles, dotted lines).
